# Supplementary material for: Distinct HLA associations of LGI1 and CASPR2-antibody diseases
Source: PubMed Central journal article supplement (PMC6118231; doi:10.1093/brain/awy109), 2018-05-18

## Supplementary Methods

### Genotyping, data processing and quality control

Genomic DNA was extracted from whole blood using the Qiagen DNeasy extraction kit (Qiagen, Manchester UK) and quality assessed using 260/280nm spectrophotometer ratios (LGC Genomics, Hoddesdon, UK). Samples were genotyped using the Illumina Infinium Global Screening Array-24+v1.0 beadchip array (Illumina, San Diego, CA). Variants were called using the Illumina GenCall algorithm (Teo *et al.*, 2007). Samples were excluded based on a call rate <98%, heterozygosity 3SD of mean and exact Hardy-Weinberg equilibrium (HWE) <10<sup>-4</sup>.

### Imputation and HLA typing

Imputation of HLA alleles was performed using SNP2HLA software, as described previously (Jia *et al.*, 2013), to impute two- and four-digit resolution classical HLA alleles for the classical HLA-A, -C, -B, -DRB1, -DQA1, -DQB1, -DPA1 and -DPB1 gene loci. In brief, SNP2HLA\_package\_v1.0.2, Beagle.3.0.4, linkage2beagle\_2.0 and Plink1.07 were used following recommended parameters (10 iterations and maximum window size of 1000 bp) as described (Neville *et al.*, 2017). The pre-built Type 1 Diabetes Genetics Consortium (T1DGC) Immunochip/HLA reference panel of 8,961 binary markers from 5,225 unrelated individuals with European ancestry was used as training set for the HLA imputation (Jia *et al.*, 2013). There was an overlap of 4,708 SNP markers between the case dataset and the reference dataset. Thresholds of 0.8 and 0.3 for posterior probability and genotype correlation respectively were applied for data quality control. In broad agreement with published data, DRB1- and DQ-alleles were not determined by imputation in 49/222 (22%) and

30/444 (7%) of alleles, respectively (Neville *et al.*, 2017). SNP2HLA demonstrated high accuracy with 95% (210/222) calls for DRB1 alleles unaltered after tissue typing. PCR-SSP data were confirmed by Sanger sequencing-based typing (PCR-SBT) to six digit resolution (Blasczyk *et al.*, 1998) for the most frequent allele, DRB1\*07:01. Linkage disequilibrium was evaluated using  $r^2$  and  $D'$  values (Wang *et al.*, 2005). HLA-DRB4 was typed at intermediate resolution in all patients to establish DRB4 carriers, and frequencies of null and absent alleles.

## References

Blasczyk R, Kotsch K, Wehling J. The nature of polymorphism of the HLA-DRB intron sequences is lineage specific. *Tissue Antigens* 1998; 52: 19–26.

Jia X, Han B, Onengut-Gumuscu S, Chen W-M, Concannon PJ, Rich SS, et al. Imputing amino acid polymorphisms in human leukocyte antigens. *PLoS ONE* 2013; 8: e64683.

Neville MJ, Lee W, Humburg P, Wong D, Barnardo M, Karpe F, et al. High resolution HLA haplotyping by imputation for a British population bioresource. *Hum. Immunol.* 2017; 78: 242–251.

Teo YY, Inouye M, Small KS, Gwilliam R, Deloukas P, Kwiatkowski DP, et al. A genotype calling algorithm for the Illumina BeadArray platform. *Bioinformatics* 2007; 23: 2741–2746.

Wang WYS, Barratt BJ, Clayton DG, Todd JA. Genome-wide association studies: theoretical and practical concerns. *Nat Rev Genet* 2005; 6: 109–118.

**Supplementary Table 1. Endophenotypic analyses performed within the LGI1 and CASPR2 cohorts**

|                                                                  |
|------------------------------------------------------------------|
| <b>LGI1-antibody patients: allele analyses</b>                   |
| Presentation with limbic encephalitis, epilepsy or neuromyotonia |
| Modified Rankin Score (mRS) change $\leq 1$ or $> 2$             |
| Drug rash present or absent                                      |
| Adverse effect of steroids present or absent                     |
| Tumour present or absent                                         |
|                                                                  |
| <b>CASPR2-antibody patients: allele analyses</b>                 |
| Presentation with limbic encephalitis, epilepsy or neuromyotonia |
| Modified Rankin Score (mRS) change $\leq 1$ or $> 2$             |
| Neuropathic pain present or absent                               |
| Tumour present or absent                                         |
|                                                                  |
| <b>LGI1-antibody patients: haplotype analyses</b>                |
| Drug rash present or absent                                      |
| Adverse effect of steroids present or absent                     |

**Supplementary Table 2. DQA1-, DQB1-, and DRB1-alleles of 13 patients with tumours.** Nine patients had LGI1-antibodies and four CASPR2-antibodies.

| <b>LGI1-antibody with tumour (n=9)</b>   |                 |                   |                   |                   |                            |
|------------------------------------------|-----------------|-------------------|-------------------|-------------------|----------------------------|
| <b>Age, sex</b>                          | <b>Syndrome</b> | <b>DQA1</b>       | <b>DQB1</b>       | <b>DRB1</b>       | <b>Tumour type</b>         |
| 79, F                                    | Epilepsy        | *05:01/<br>*02:01 | *02:01/<br>*02:02 | *07:01/<br>*03:01 | Basal cell carcinoma (BCC) |
| 51, M                                    | LE              | *01:01/<br>*02:01 | *05:01/<br>*03:03 | *07:01/<br>*01:03 | BCC                        |
| 67, M                                    | LE              | *03:01/<br>*02:01 | *03:03/<br>*02:02 | *07:01/<br>*09:01 | Bladder                    |
| 70, M                                    | Epilepsy        | *02:01/<br>*02:01 | *02:02/<br>*02:02 | *07:01/<br>*07:01 | Skin, type not known       |
| 64, F                                    | LE              | *03:01/<br>*02:01 | *03:03/<br>*02:02 | *07:01/<br>*09:01 | Breast (remote history)    |
| 76, M                                    | Epilepsy        | *03:01/<br>*02:01 | *03:03/<br>*02:02 | *07:01/<br>*09:01 | Scalp, squamous or BCC     |
| 53, M                                    | LE              | *02:01/<br>*02:01 | *02:02/<br>*02:02 | *07:01/<br>*07:01 | Adenocarcinoma of prostate |
| 64, M                                    | LE              | *03:01/<br>*02:01 | *03:01/<br>*02:02 | *07:01/<br>*04:01 | BCC                        |
| 63, M                                    | Epilepsy        | *01:03/<br>*01:03 | *03:03/<br>*02:02 | *07:01/<br>*07:01 | Dysplastic colonic polyp   |
| <b>CASPR2-antibody with tumour (n=4)</b> |                 |                   |                   |                   |                            |
| <b>Age, sex</b>                          | <b>Syndrome</b> | <b>DQA1</b>       | <b>DQB1</b>       | <b>DRB1</b>       | <b>Tumour type</b>         |
| 74, M                                    | LE              | *02:01/<br>*05:01 | *03:03/<br>*03:01 | *07:01/<br>*11:02 | Thymic cyst                |
| 71, M                                    | Epilepsy        | *05:01/<br>*01:01 | *03:01/<br>*05:03 | *14:54/<br>*11:01 | Prostate                   |
| 72, M                                    | Epilepsy        | *01:01/<br>*01:01 | *05:01/<br>*05:03 | *14:01/<br>*01:01 | Prostate                   |
| 74, M                                    | LE              | *02:01/<br>*02:01 | *02:02/<br>*03:03 | *07:01/<br>*07:01 | Pancreatic                 |

**Supplementary Table 3. Proportion of patients who do not carry DRB4 alleles**

**or express null DRB4 alleles.** Patients were divided into three groups: i) DRB4 expressed (individuals carrying at least one copy of a DRB4 expressed allele), ii) DRB4 not carried (individuals carrying no DRB4 alleles) and iii) DRB4 null only (individuals carrying one or two copies of a DRB4 null allele and zero copies of a DRB4 expressed allele). The null *HLA-DRB4* allele is known to be in linkage disequilibrium with the DQB1\*07:01-DQB1\*03:03 haplotype, whereas *HLA-DRB4* is typically expressed within the DQB1\*07:01-DQB1\*02:02 haplotype.

| <b>Antibody</b>    | <b>DRB4 expressed</b> | <b>DRB4 not carried</b> | <b>DRB4 null only</b> |
|--------------------|-----------------------|-------------------------|-----------------------|
| LGI1 (n=68)        | 57 (83.8%)            | 2 (2.9%)                | 9 (13.2%)             |
| CASPR2 (n=31)      | 12 (38.7%)            | 16 (51.6%)              | 3 (9.7%)              |
| CASPR2/LGI1 (n=3)  | 3 (100%)              | 0 (0%)                  | 0 (0%)                |
| VGKC (n=9)         | 5 (55.5%)             | 4 (44.4%)               | 0 (0%)                |
| Controls (n=5133)* | 2578 (50.2%)          | 2306 (44.9%)            | 249 (4.9%)            |

\*Local data based on consecutive deceased organ donors and patients awaiting stem cell transplantation (<http://odt.nhs.uk/pdf/antigen.pdf>).

|               | <b>15-mer start position</b> | <b>Extended core</b>                 | <b>LGI1 allele(s) binding</b>                                  | <b>Highest affinity [nM]</b> | <b>CASPR2 allele(s) binding</b>      |
|---------------|------------------------------|--------------------------------------|----------------------------------------------------------------|------------------------------|--------------------------------------|
| <b>LGI1</b>   | 12-21                        | KRIAYFLCLLSALLL                      | DPA1*02:01/DPB1*11:01                                          | 14.07                        | -                                    |
|               | 81-87                        | FLFTPSLQLLL                          | DRB1*07:01;<br>DPA1*02:01/DPB1*11:01;<br>DQA1*02:01/DQB1*02:02 | 5.79                         | DRB1*11:01                           |
|               | 97-101                       | FDVISDDAF                            | DQA1*02:01/DQB1*02:02                                          | 722.35                       | -                                    |
|               | 129-135                      | FRGLKSLIHLSL                         | DRB1*07:01                                                     | 8.82                         | DRB1*11:01                           |
|               | 236-242                      | FSYLNDEYVIAQPF                       | DQA1*02:01/DQB1*02:02                                          | 594.18                       | -                                    |
|               | 257-259                      | IFLEWDHVE                            | DQA1*02:01/DQB1*02:02                                          | 880.63                       | -                                    |
|               | 289                          | LYVIVAQLF                            | DQA1*02:01/DQB1*02:02                                          | 924.59                       | -                                    |
|               | 342-344                      | FVVADSSKA                            | DRB1*07:01                                                     | 36.94                        | -                                    |
|               | 362-366                      | FYSHQSLHA                            | DRB1*07:01                                                     | 25.49                        | -                                    |
|               | 371-376                      | WYRDTDVEY                            | DQA1*02:01/DQB1*02:02                                          | 440.50                       | -                                    |
|               | 406-409                      | YQWNKATQL                            | DRB1*07:01                                                     | 26.51                        | -                                    |
|               | 520-524                      | FTHVSINKR                            | DRB1*07:01                                                     | 22.60                        | DRB1*11:01                           |
| 529-534       | FLFASSFKGN                   | DRB1*07:01;<br>DPA1*02:01/DPB1*11:01 | 15.77                                                          | DRB1*11:01                   |                                      |
|               | <b>15-mer start position</b> | <b>Extended core</b>                 | <b>CASPR2 allele(s) binding</b>                                | <b>Highest affinity [nM]</b> | <b>LGI1 allele(s) binding</b>        |
| <b>CASPR2</b> | 1-5                          | PRAGCGAALLL                          | DQA1*05:01/DQB1*03:01                                          | 15.65                        | -                                    |
|               | 192-197                      | YRFRNKKMK                            | DRB1*11:01                                                     | 21.90                        | -                                    |
|               | 232-235                      | YITLLELKKAKLV                        | DRB1*11:01                                                     | 27.15                        | -                                    |
|               | 682-687                      | YFCKMSRLLNT                          | DRB1*11:01                                                     | 16.94                        | DRB1*07:01;<br>DPA1*02:01/DPB1*11:01 |
|               | 713-715                      | WGGSGPGIQ                            | DQA1*05:01/DQB1*03:01                                          | 23.53                        | -                                    |
|               | 823                          | FKTLTPWGV                            | DRB1*11:01                                                     | 34.05                        | DRB1*07:01                           |
|               | 918-923                      | FVGGAGGQQG                           | DQA1*05:01/DQB1*03:01                                          | 12.95                        | -                                    |

|  |           |                 |                       |       |                       |
|--|-----------|-----------------|-----------------------|-------|-----------------------|
|  | 928-935   | FLGCIRSLRMNGV   | DRB1*11:01            | 17.26 | DRB1*07:01            |
|  | 1122      | FLKLDHYPS       | DRB1*11:01            | 36.97 | -                     |
|  | 1178-1184 | FNQIAPLKAALR    | DRB1*11:01            | 13.04 | DRB1*07:01            |
|  | 1257-1262 | IIGGVIAVV       | DQA1*05:01/DQB1*03:01 | 13.39 | -                     |
|  | 1276-1283 | LIRYMFRHKG      | DRB1*11:01            | 10.82 | DPA1*02:01/DPB1*11:01 |
|  | 1293-1298 | AKGAESAESADAAIM | DQA1*05:01/DQB1*03:01 | 23.07 | DQA1*02:01/DQB1*03:03 |

**Supplementary Table 4. Peptides derived from LGI1 and CASPR2 sequences and HLA binding partners.** The peptides from LGI1 or CASPR2 which are predicted to bind HLA variants derived from the haplotype analyses. The positions of the peptide clusters within the full-length molecule (15-mer starting position), the extended core amino acid sequence, highest affinity of the peptides in the cluster (nM), and predicted binding to LGI1 and/or CASPR2-cohort haplotypes.

**Supplementary Figure 1. HLA-allele associations across the VGKC-complex.**

HLA Class I and II allele frequencies across patients with autoantibodies to LGI1 (n=68), CASPR2 (n=31), intracellular domains of VGKCs (n=9) and both LGI1 and CASPR2 (n=3), and in healthy controls (n=5553). Colours represent adjusted p values of alleles overrepresented in patients. Given very high proportions of patients with some alleles, under-representations have not been considered, as they are likely to reflect this bias rather than protective alleles.

**Supplementary Figure 2. HLA DR-DQ haplotype block associations.**

HLA DR-DQ haplotypes across patients with autoantibodies to LGI1 (n=68), CASPR2 (n=31), intracellular domains of VGKCs (n=9) and both LGI1 and CASPR2 (n=3), and in healthy controls (n=5553). Colours represent adjusted p values of haplotypes overrepresented in patients.

**Supplementary Figure 3. HLA DP haplotype block associations.**

HLA DP haplotype across patients with autoantibodies to LGI1 (n=68), CASPR2 (n=31), intracellular domains of VGKCs (n=9) and both LGI1 and CASPR2 (n=3), and in healthy controls (n=5553). Single colour represents adjusted p value of haplotype overrepresented in LGI1-antibody patients.

**Supplementary Figure 4. HLA-B and C haplotype block associations.**

HLA-B and C haplotypes across patients with autoantibodies to LGI1 (n=68), CASPR2 (n=31), intracellular domains of VGKCs (n=9) and both LGI1 and CASPR2 (n=3),



and in healthy controls (n=5553). Single colour represents adjusted p value of haplotype overrepresented in LGI1-antibody patients.

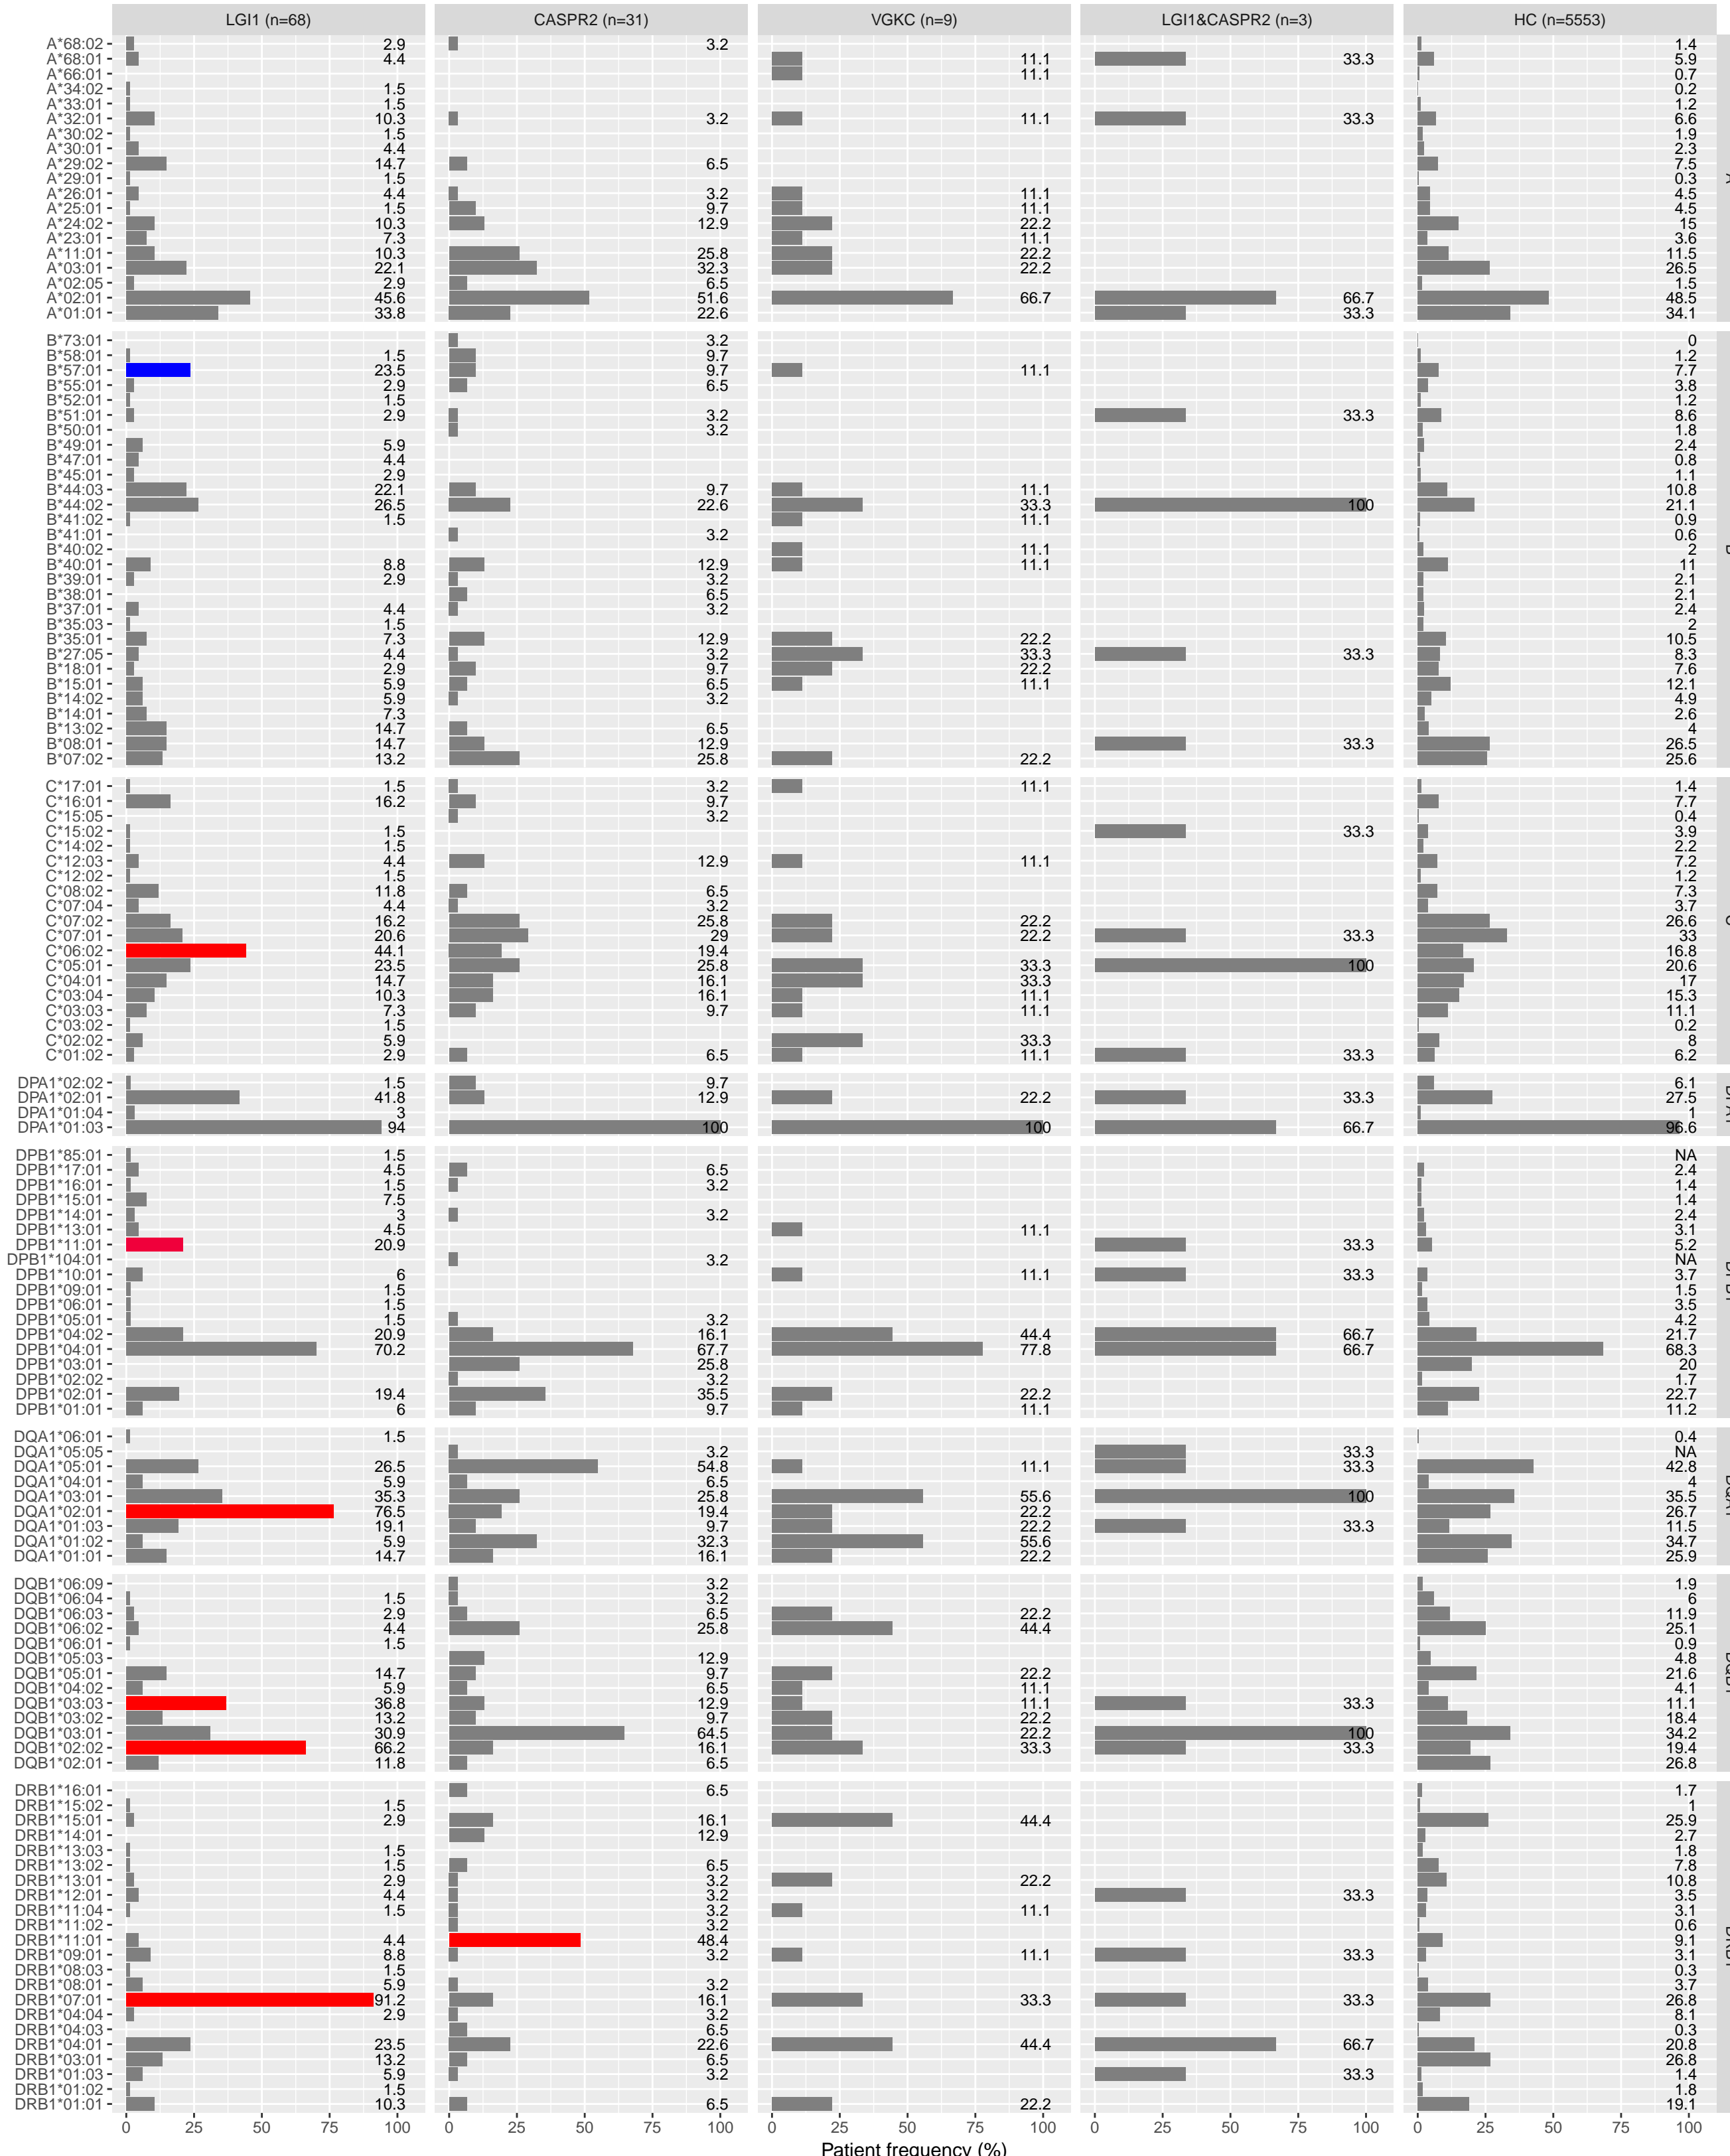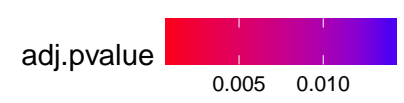

Supplementary Figure 1

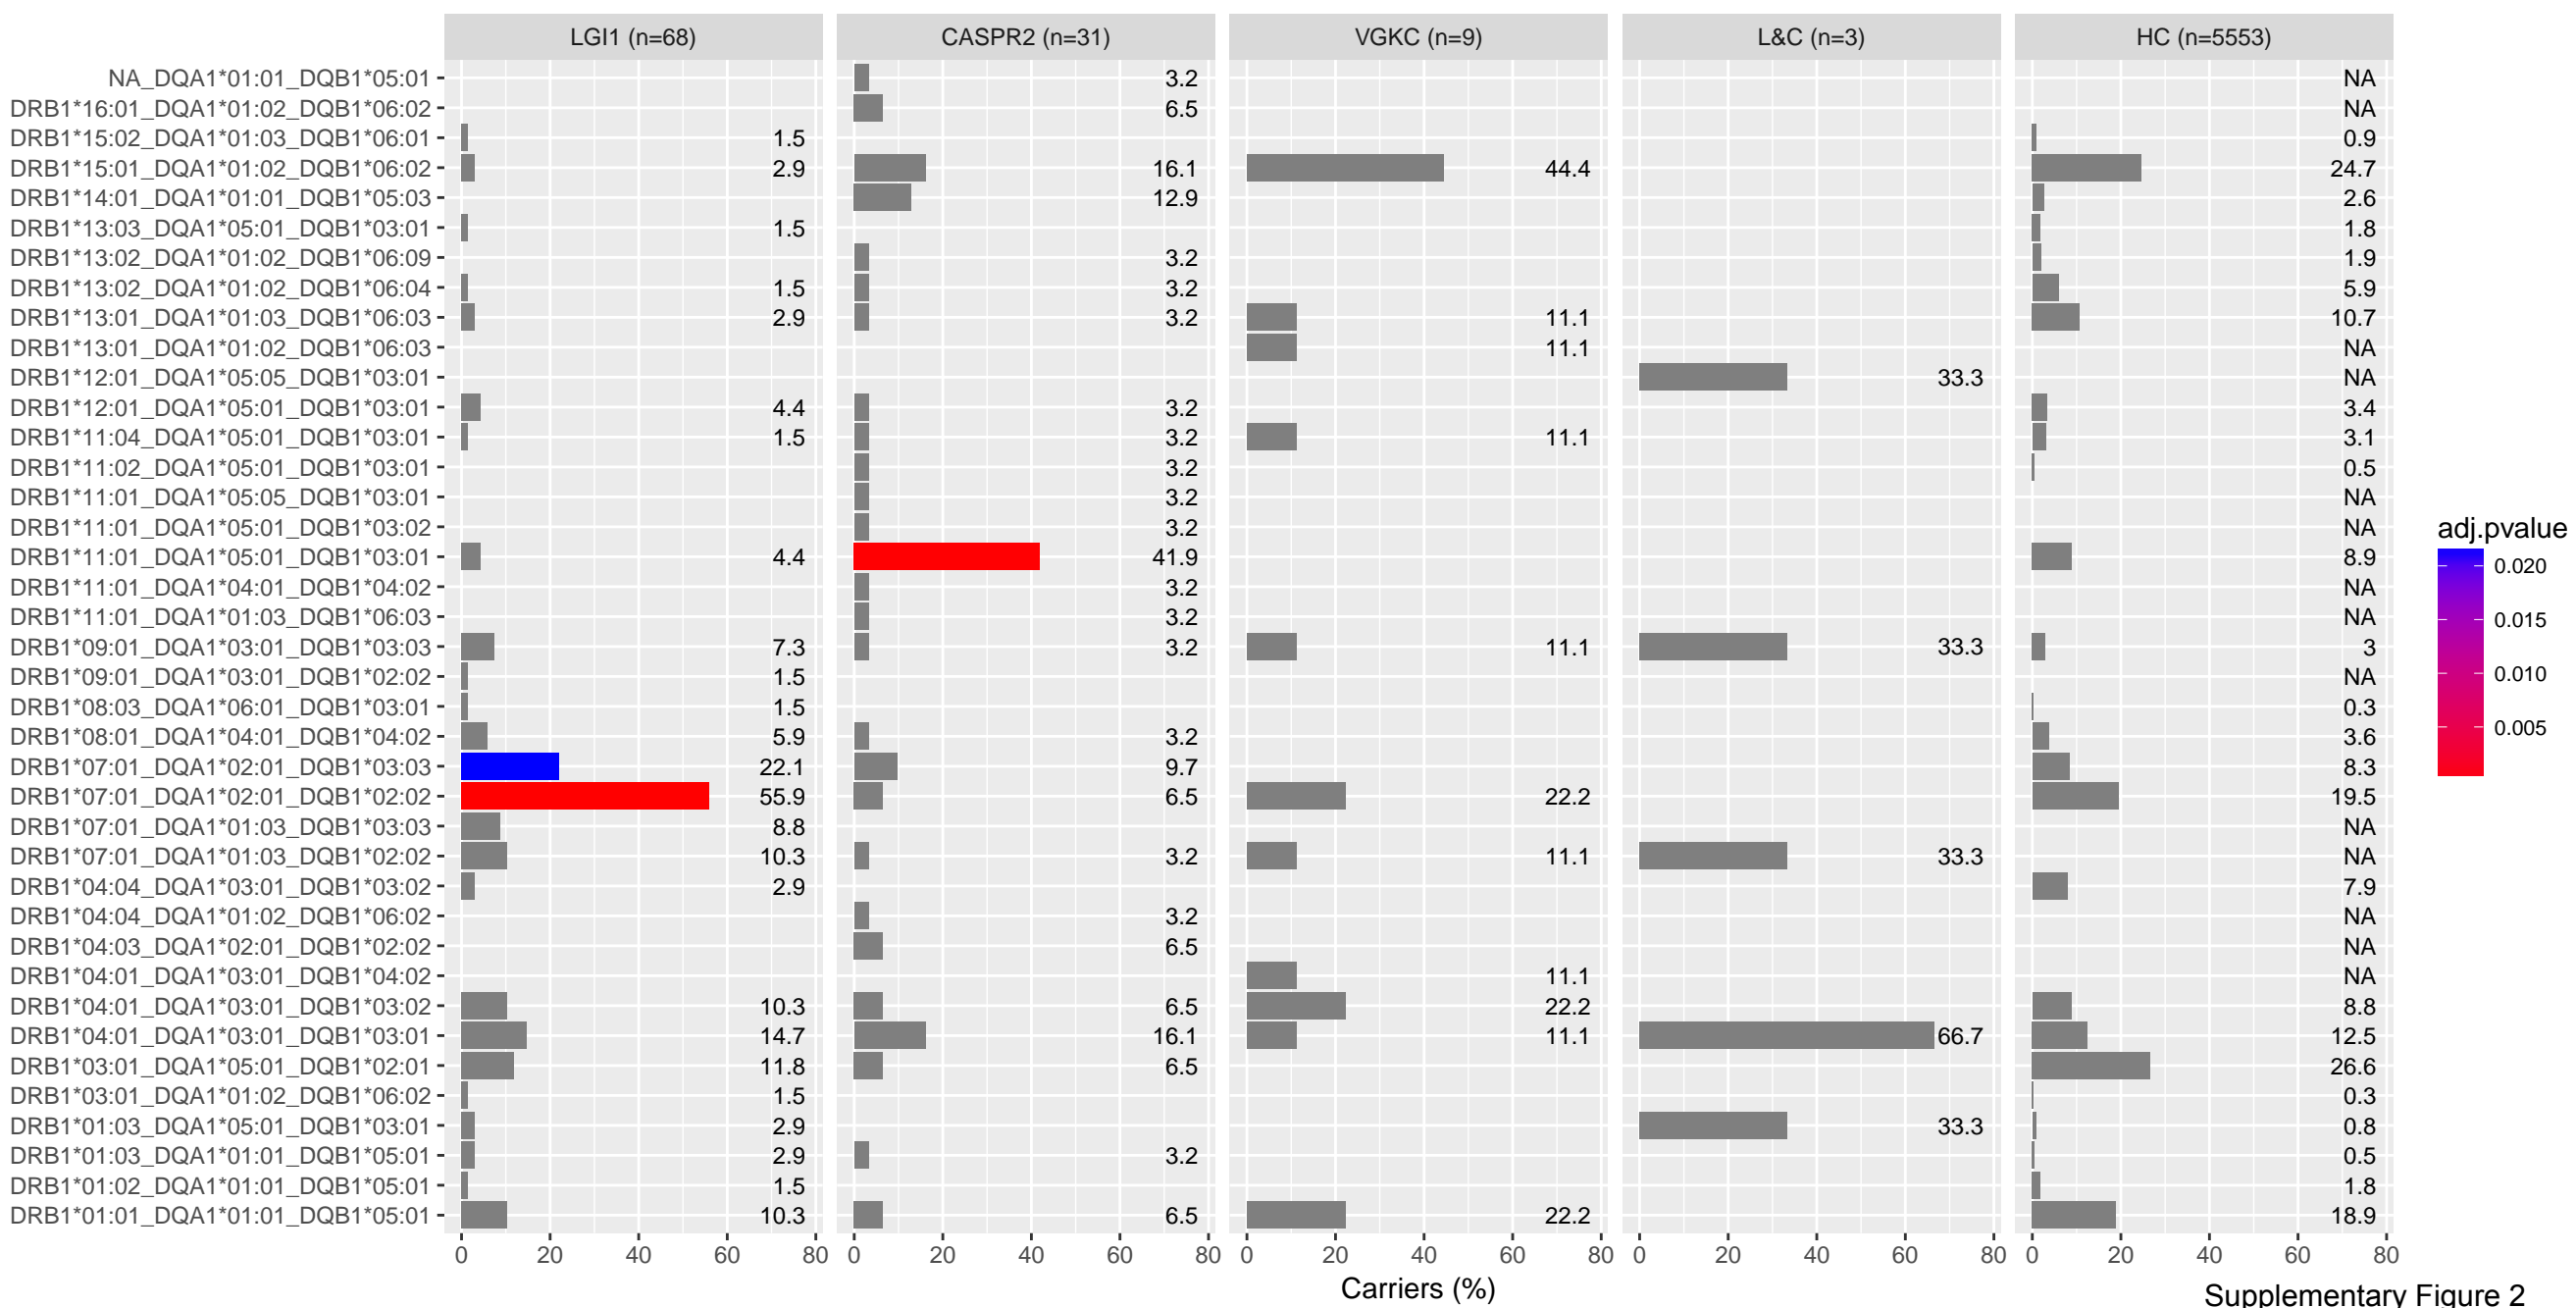

Supplementary Figure 2

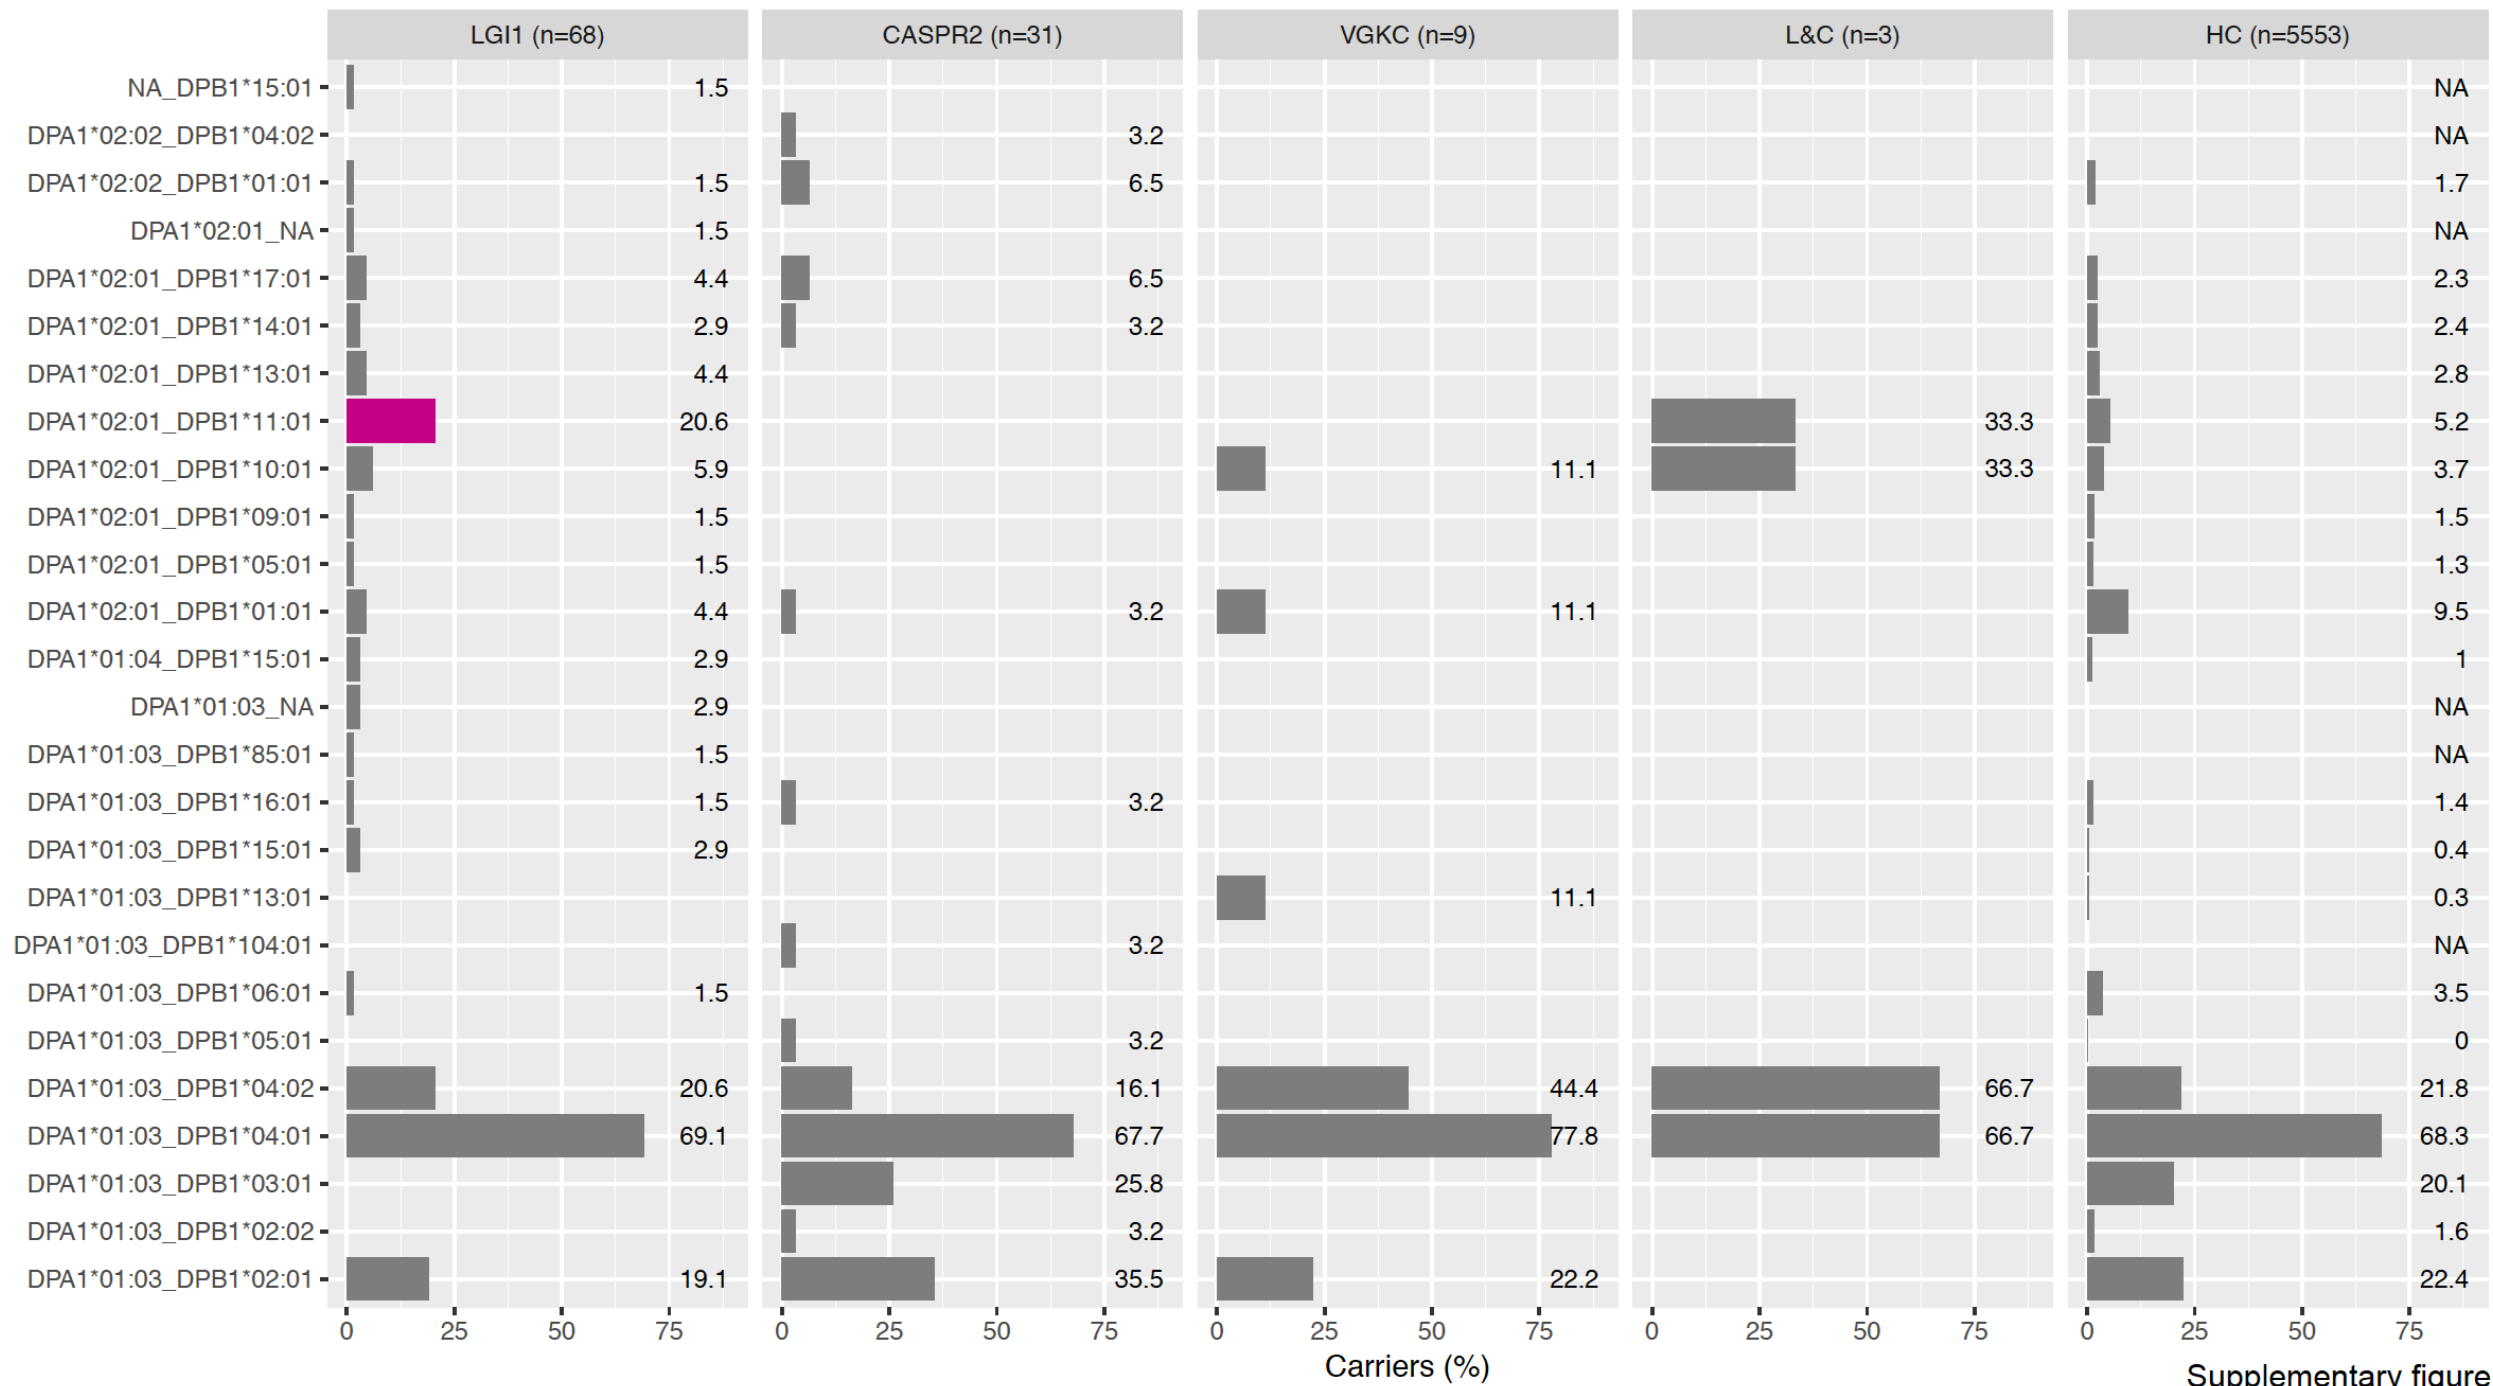

Supplementary figure 3

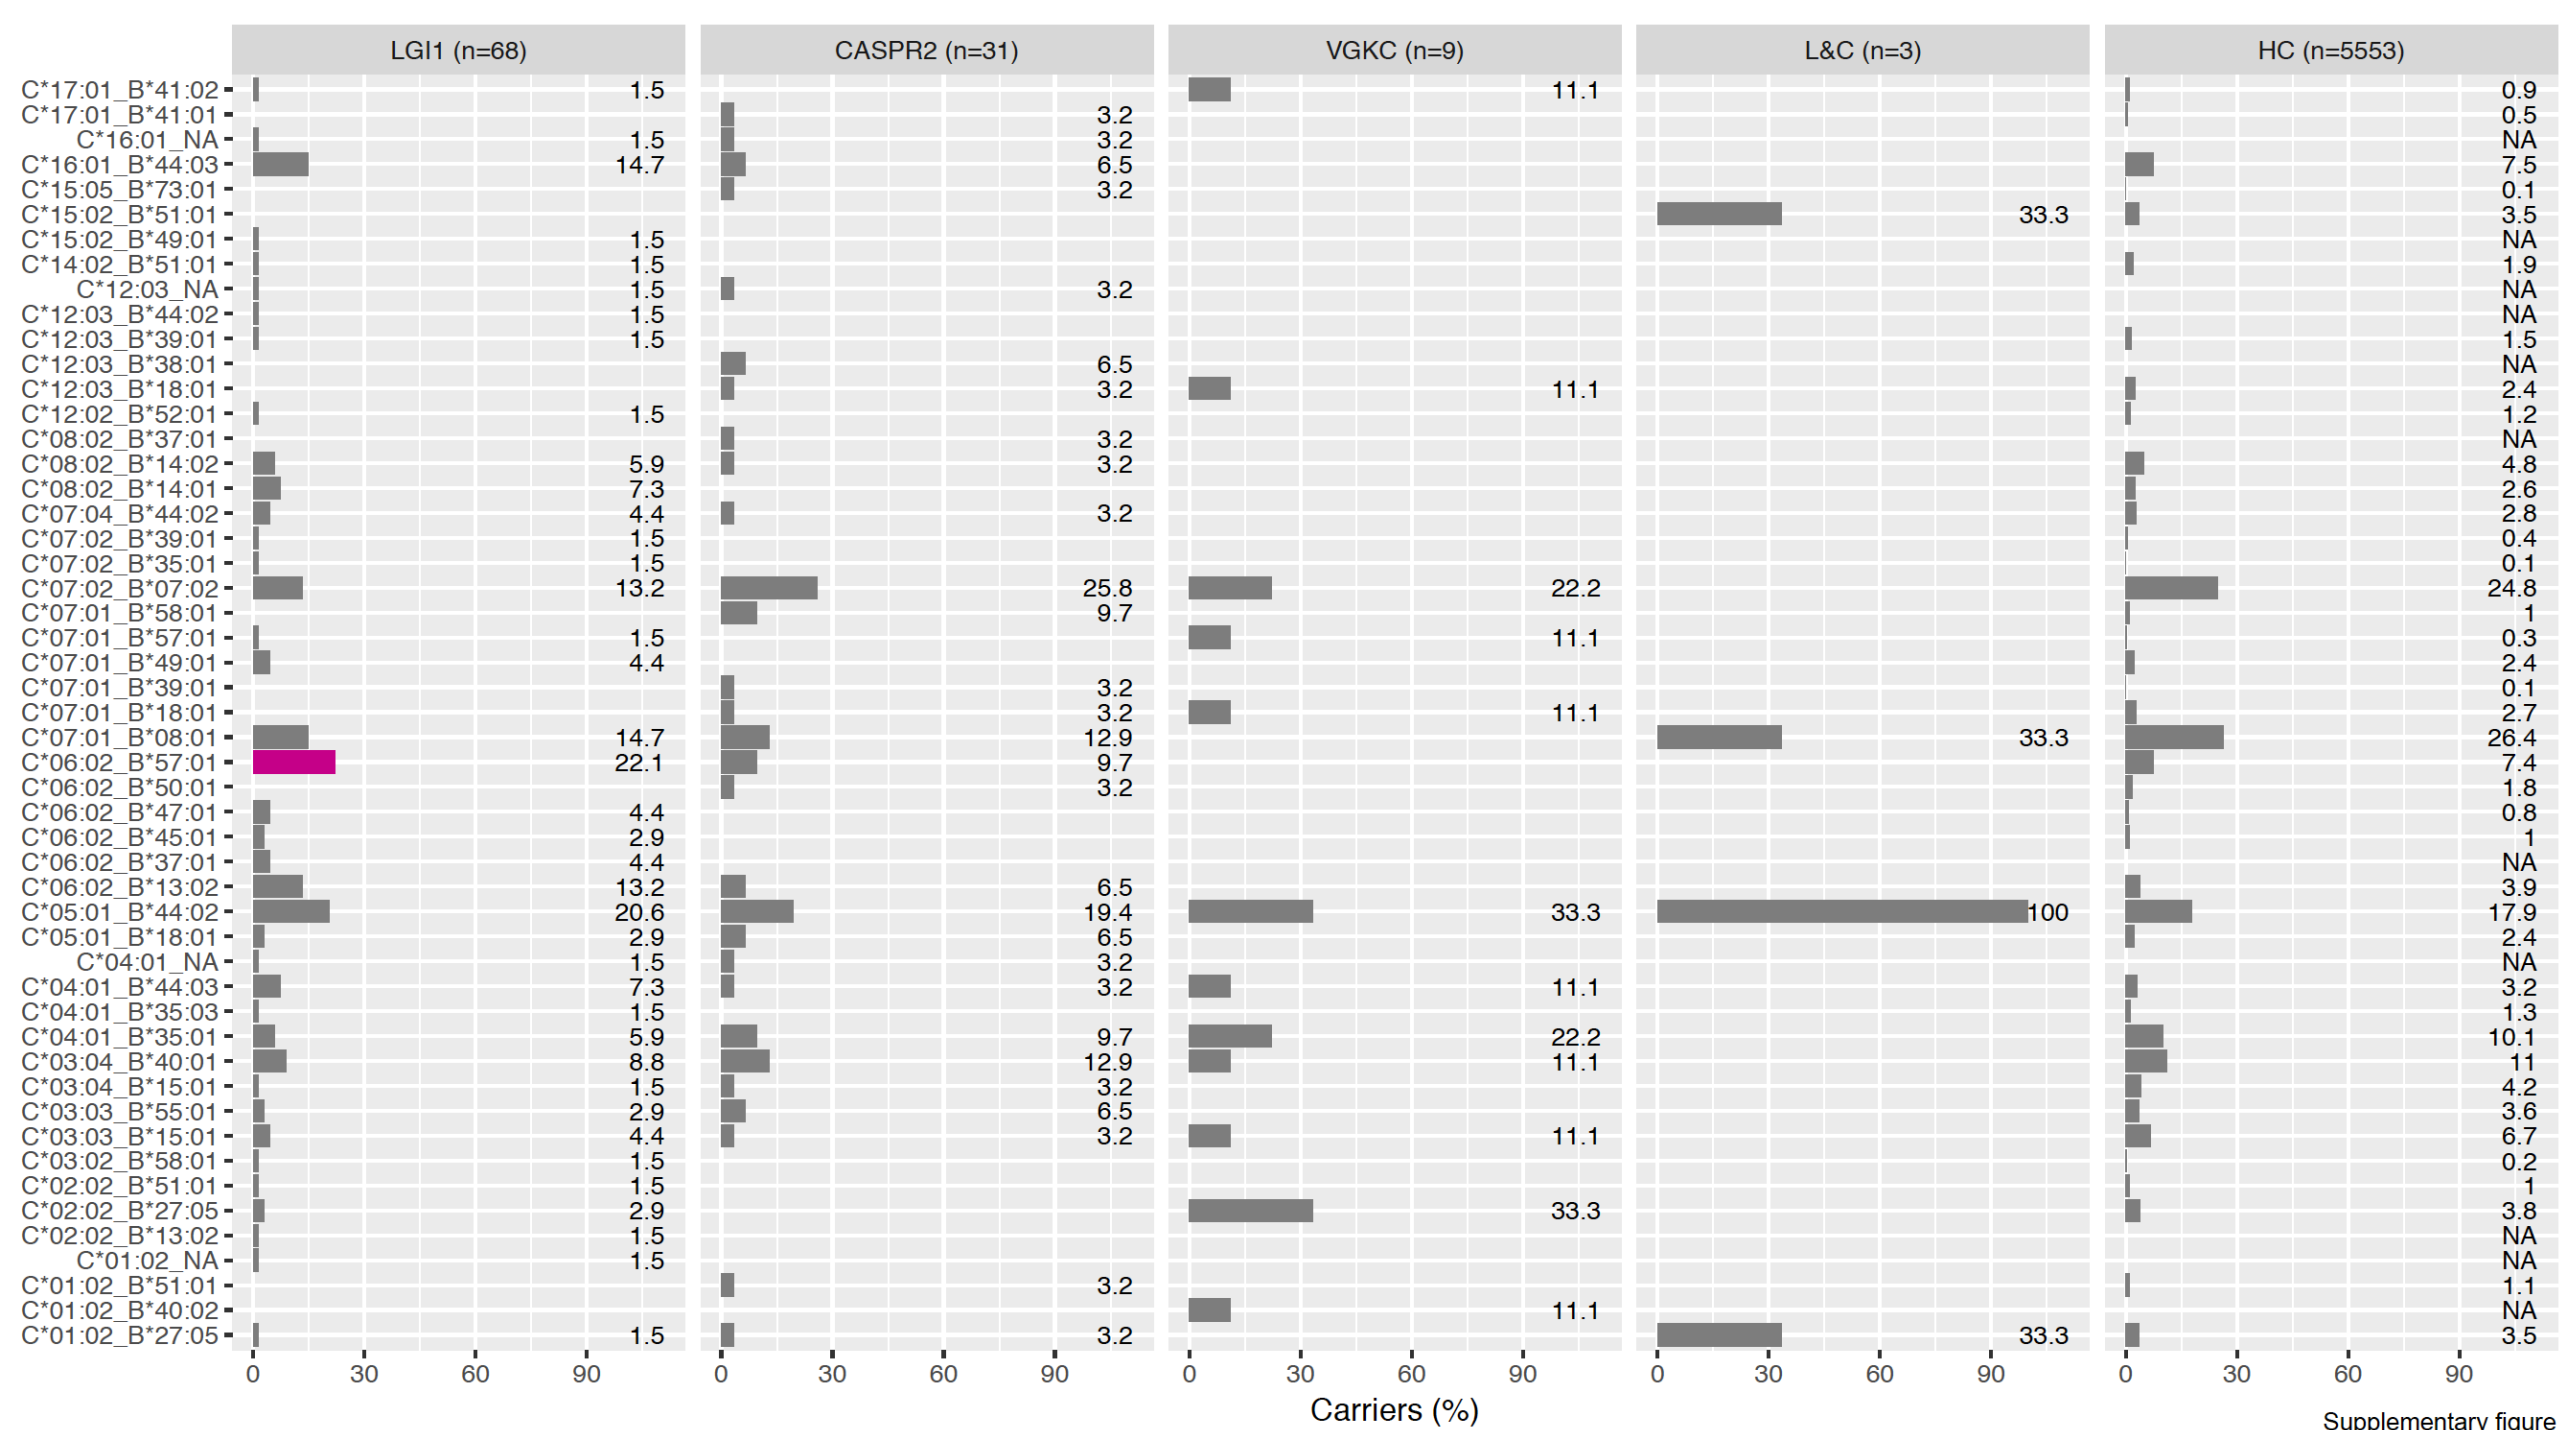

Supplement: awy109_brain-2017-01695-File004.pdf [file awy109_brain-2017-01695-File004.pdf]
